# Supplementary material for: Microbiota Changes Due to Grape Seed Extract Diet Improved Intestinal Homeostasis and Decreased Fatness in Parental Broiler Hens
Source: PubMed Central journal article supplement (PMC7465624; doi:10.3390/microorganisms8081141), 2020-07-28
Supplement: microorganisms-08-01141-s001.pdf [file microorganisms-08-01141-s001.pdf]

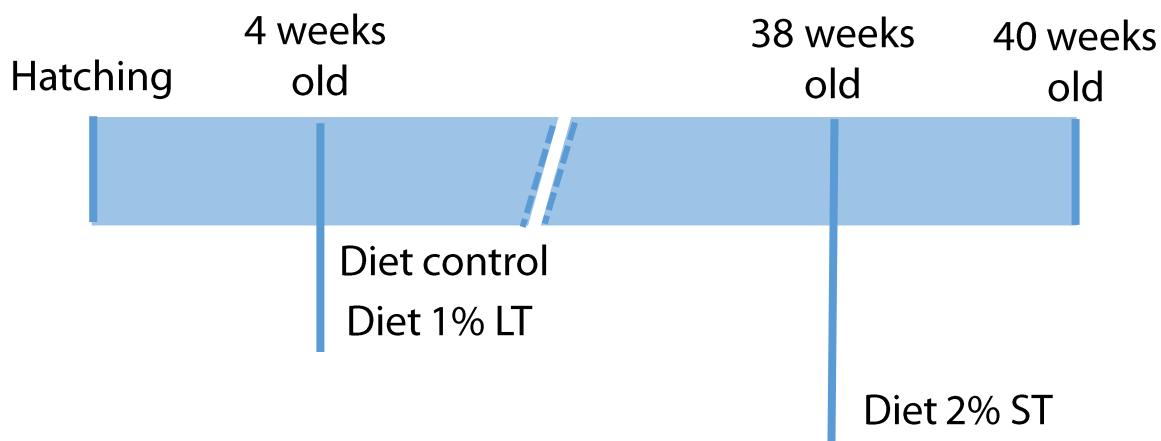

**Supplemental Data 1. A scheme of the protocol for experimental trials.**

From the first day to the 4<sup>th</sup> week, all chicks received an ad libitum diet (free access to food). At 4<sup>th</sup> week, two groups of hens were separated in function of 2 types of diets: control diet and the same diet supplemented with GSE at 1% of total diet. At week 38 of age, a third group was created from the control group and received the diet supplemented with 2% GSE for two weeks.

| Gene            | Sens                          | Reverse                |
|-----------------|-------------------------------|------------------------|
| ACTB            | ACGGAACCACAGTTTATCATC         | GTCCCAGTCTTCAACTATACC  |
| EEF1A1          | AGCAGACTTTGTGACCTTGCC         | TCACATGAGACAGACGGTTGC  |
| GAPDH           | ACGGATTTGGTCGTATTGGG          | TGATTTTGGAGGATCTCGC    |
| IL22            | TGTTGTTGCTGTTTCCCTCTTC        | CACCCCTGTCCCTTTTGGA    |
| mucin 2 (MUC-2) | GCTGATTGTCACTCACGCCTT         | ATCTGCCTGAATCACAGGTGC  |
| NOS2 (iNOS)     | CCACCAGGAGATGTTGAACTATG<br>TC | CCAGATGTGTGTTTTCCATGCA |
| IL1B            | AGGCTCAACATTGCGCTGTA          | CTTGTAGCCCTTGATGCCCA   |
| TGFB1           | CGCTCAGAACGACGTCAA            | GTCGTCCACACCAACGAG     |
| IgA             | GTCACCGTCACCTGGACTACA         | ACCGATGGTCTCCTTCACATC  |

**Supplemental Data 2. Oligonucleotide primer sequences.**
